# Supplementary material for: Electrochemical water oxidation by cobalt-Prussian blue coordination polymer and theoretical studies of the electronic structure of the active species
Source: Royal Society of Chemistry journal article supplement (doi:10.1039/c8dt04660c), 2019-01-01
Supplement: c8dt04660c1.pdf [file c8dt04660c1.pdf]

## Supplementary information

# Electrochemical water oxidation by cobalt-Prussian blue coordination polymer and theoretical studies of the electronic structure of the active species

**Bruno M. Pires<sup>1</sup>, Pãmyla L. dos Santos<sup>1</sup>, Vera Katic<sup>1</sup>, Stefan Strothauer<sup>1,2</sup>, Richard Landers<sup>3</sup> André L. B. Formiga<sup>1</sup>, Juliano A. Bonacin<sup>1\*</sup>**

<sup>1</sup>Institute of Chemistry, University of Campinas, P. O. Box 6154, 13083-970, Campinas, SP, Brazil; e-mail: \*jbonacin@iqm.unicamp.br

<sup>2</sup>Center for Scientific Computing, J. W. Goethe-Universität, Max-von-Laue-Strasse 1, D-60438 Frankfurt am Main, Germany

<sup>3</sup>Institute of Physics Gleb Wataghin, University of Campinas, Campinas 13083-859, Brazil

**Table S1.** Onset potentials for  $j = 0.5 \text{ mA cm}^{-2}$  for the water oxidation reaction using the different modified FTO electrodes. Potentials in V vs SCE

| pH   | $E_{\text{onset CoHCF}}$ | $E_{\text{onset CoFeisn}}$ |
|------|--------------------------|----------------------------|
| 3.0  | 1.794                    | 1.739                      |
| 5.0  | 1.633                    | 1.528                      |
| 7.0  | 1.421                    | 1.309                      |
| 9.0  | 1.396                    | 1.199                      |
| 11.0 | 1.126                    | 0.888                      |

### Electrochemical Impedance Spectroscopy – Equivalent circuits

Equivalent circuits were obtained for each of the electrodes used in the water oxidation experiments after impedance analysis. The circuits were generated using the Equivalent Circuit Tool of the Software NOVA® 1.10.1 and fitted based on the corresponding Nyquist plots by adding circuit elements in agreement with the properties of the modified FTOs and the electrode/electrolyte interface. Furthermore, the values of  $\chi^2$  obtained by the fitting were as low as possible in order to obtain a trustworthy analysis.

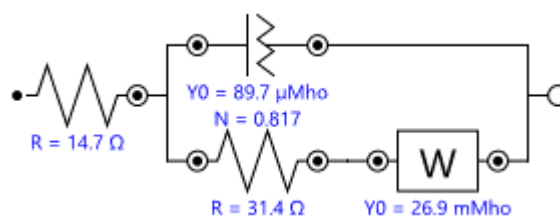

**Figure S1.** Equivalent circuit obtained for bare FTO electrode

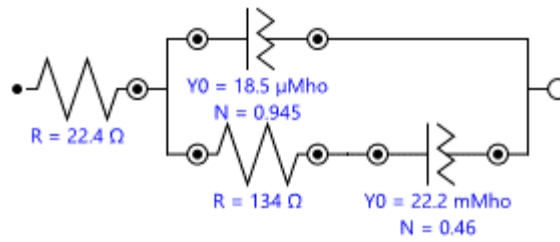

**Figure S2.** Equivalent circuit obtained for FTO/CoHCF electrode

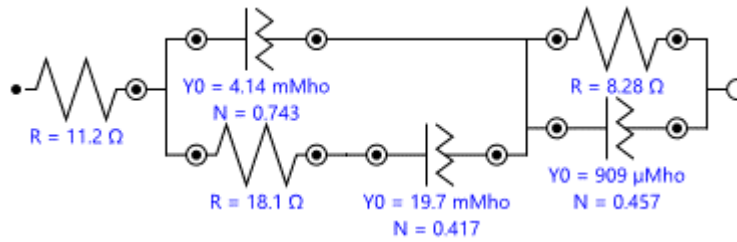

**Figure S3.** Equivalent circuit obtained for FTO/CoFeisn electrode

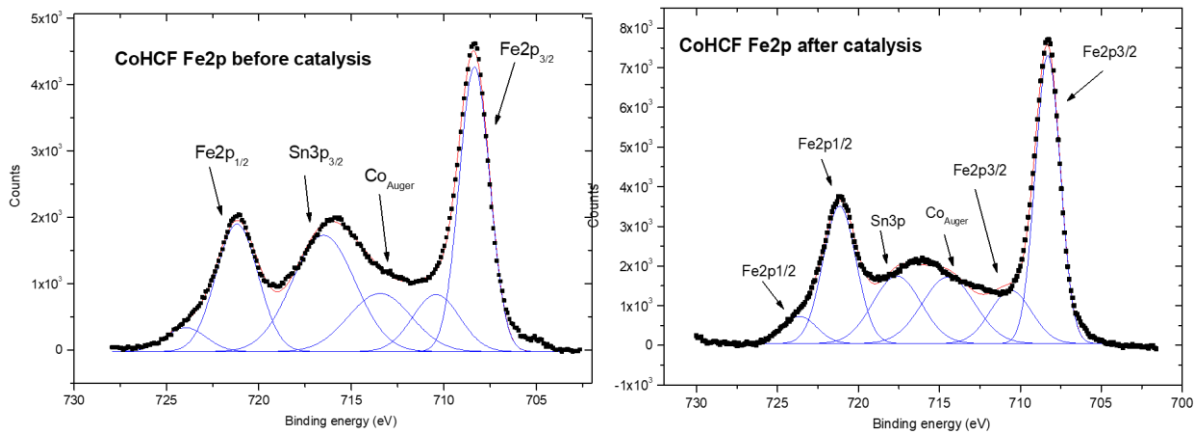

**Figure S4.** XPS spectrum of the Fe 2p range of FTO/CoHCF electrode before and after water electrolysis.

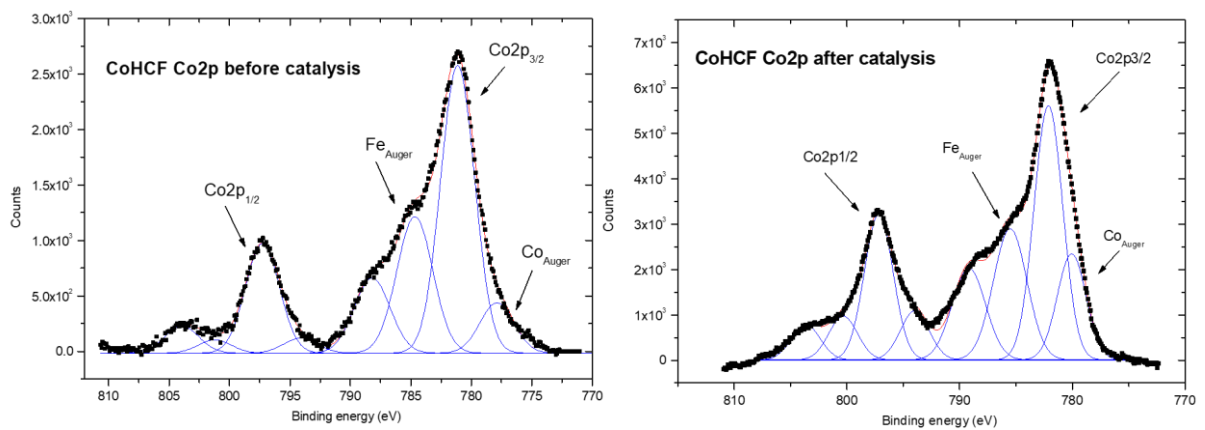

**Figure S5.** XPS spectrum of the Co 2p range of FTO/CoHCF electrode before and after water electrolysis.

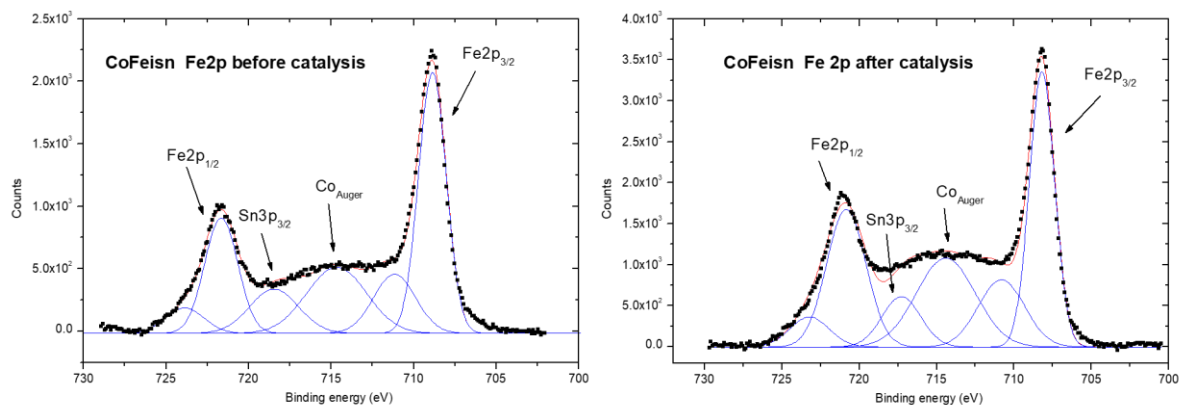

**Figure S6.** XPS spectrum of the Fe 2p range of FTO/CoFeisn electrode

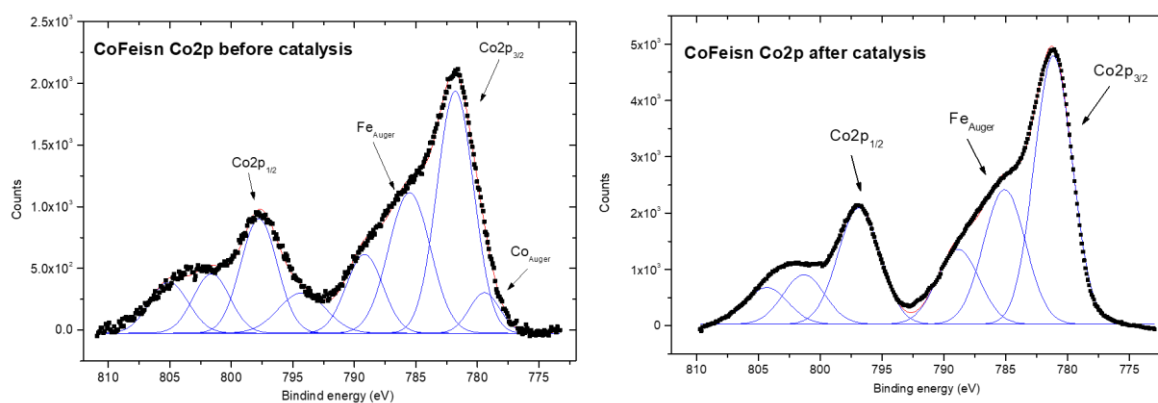

**Figure S7.** XPS spectrum of the Co 2p range of FTO/CoFeisn electrode before and after water electrolysis.

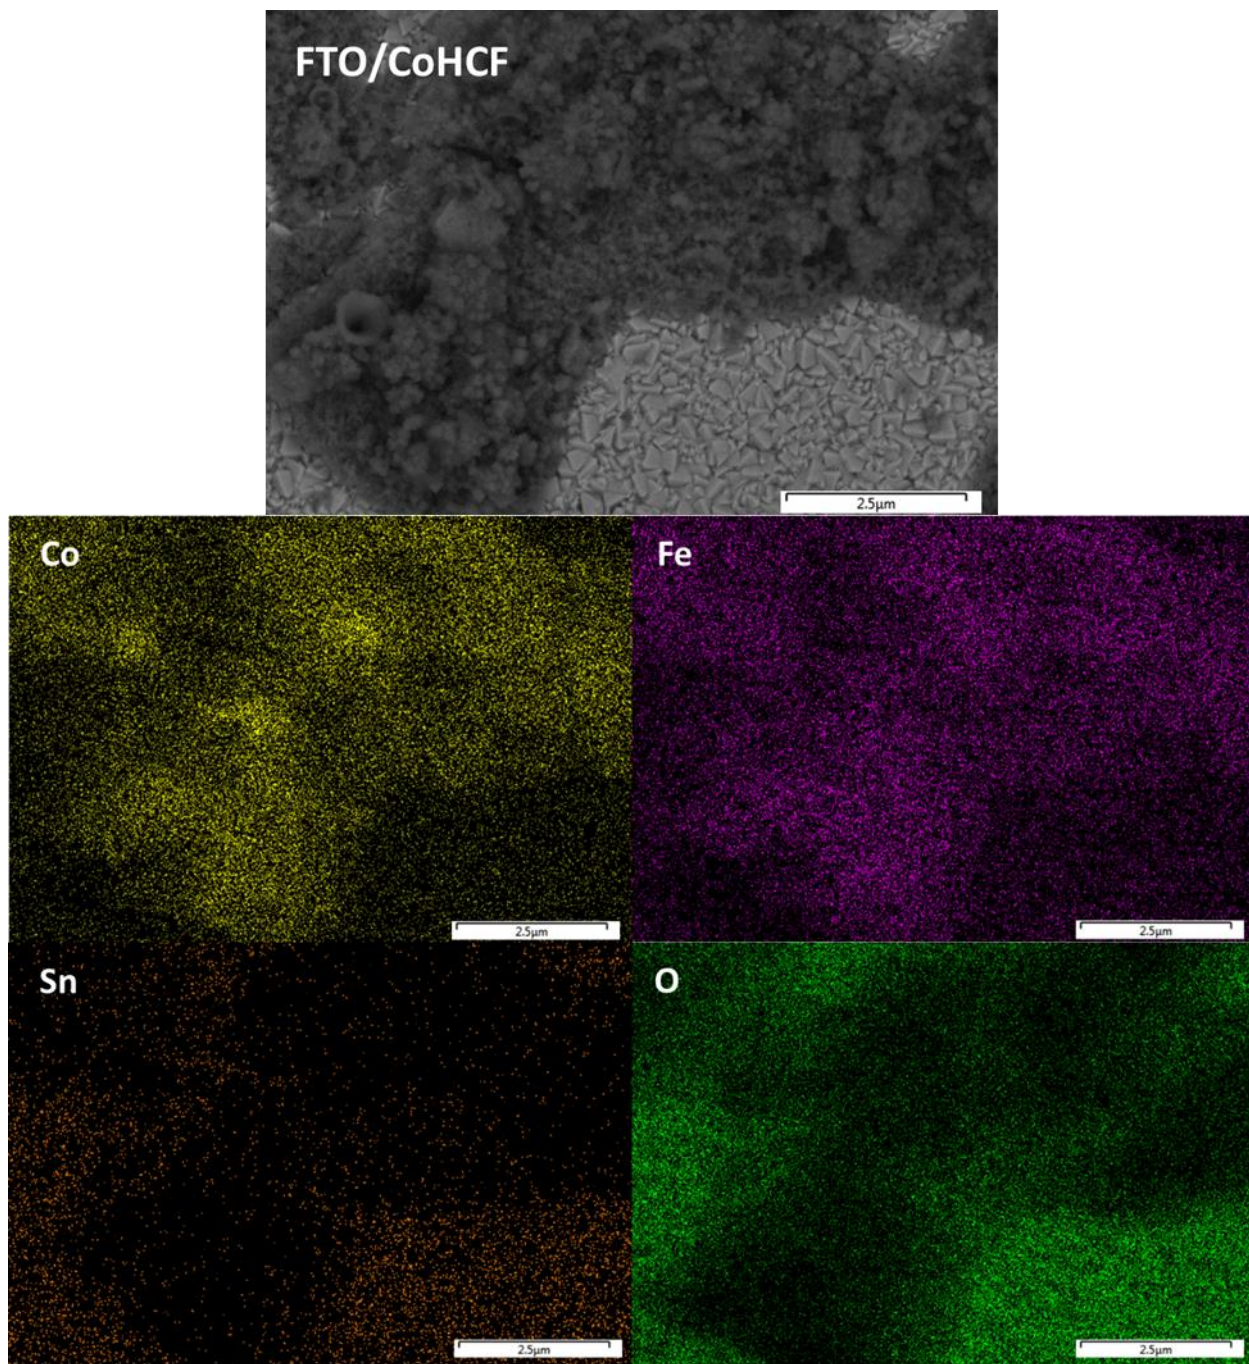

**Figure S8.** SEM micrographs and EDS analysis of FTO/CoHCF electrode.



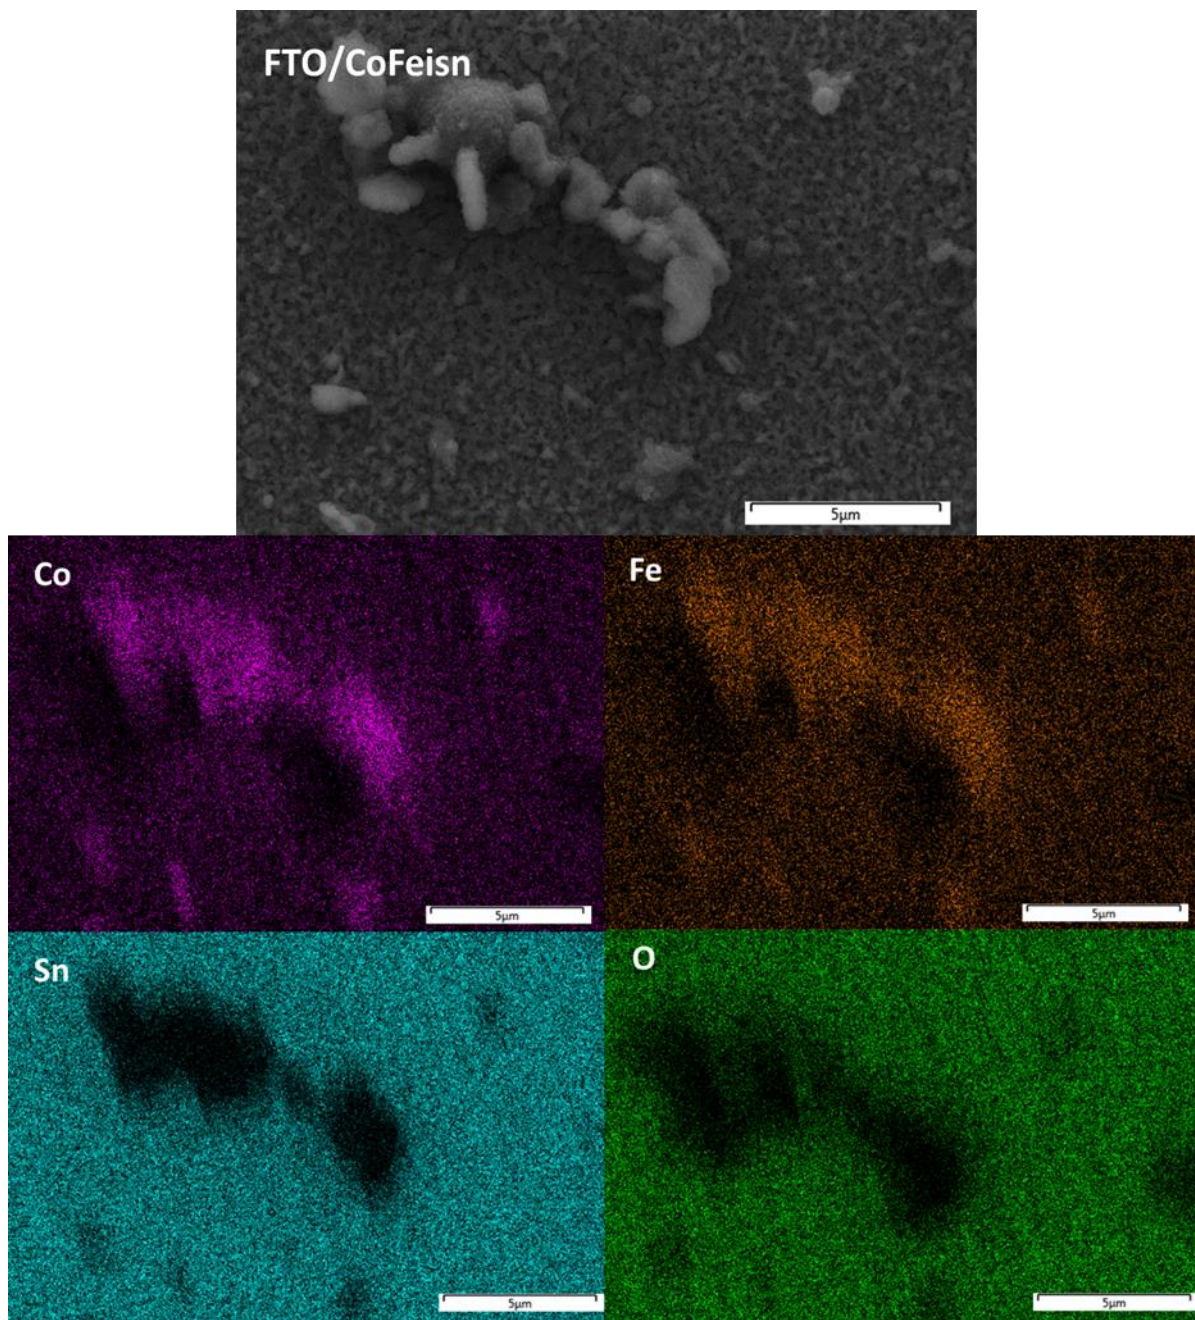

**Figure S9.** SEM micrographs and EDS analysis of FTO/CoFeisn electrode.

**Table S2.** Spin states and spin populations calculated for the  $\{[\text{Co}(\text{O})(\text{NC})_4](\mu_2\text{-NC})[\text{Fe}(\text{CN})_6]\}^{5-}$  cluster embedded in the array of point-charges using U-M06L/Def2-TZVP.

|                       | Rel. En. (kcal mol <sup>-1</sup> ) | Spin population |      |       |       |
|-----------------------|------------------------------------|-----------------|------|-------|-------|
|                       |                                    | Co              | O    | Fe    | Total |
| Singlet ( <i>BS</i> ) | 0.20                               | -0.01           | 1.00 | -1.19 | 0.00  |
| Triplet               | 0.00                               | -0.01           | 1.03 | 1.15  | 2.00  |
| Triplet ( <i>BS</i> ) | 18.9                               | 1.63            | 1.15 | -1.18 | 2.00  |
| Quintet               | 18.4                               | 1.64            | 1.15 | 1.19  | 4.00  |
| Quintet ( <i>BS</i> ) | <i>unstable</i>                    |                 |      |       | 4.00  |
| Septet                | 33.9                               | 2.98            | 1.47 | 1.21  | 6.00  |

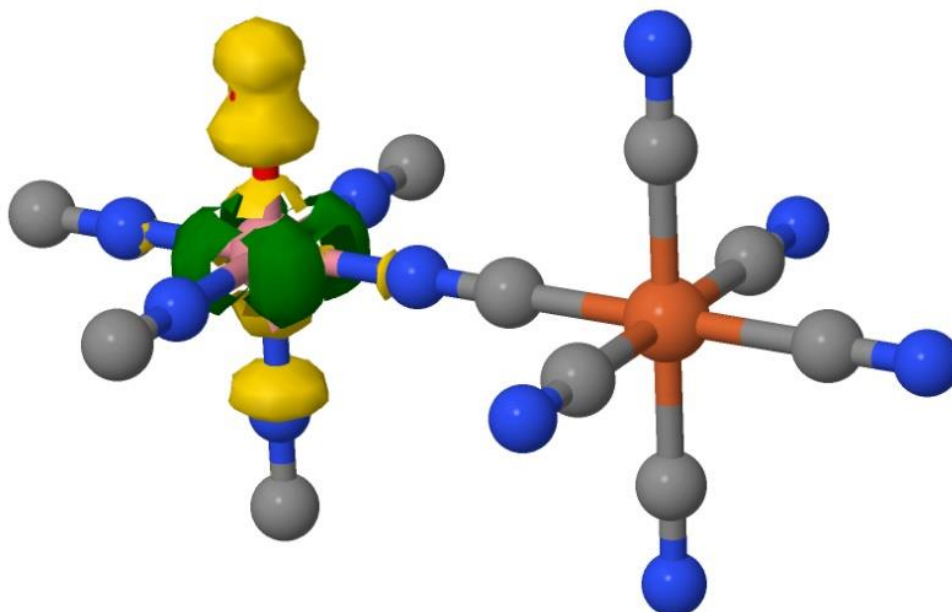

**Figure S10.** Difference density for the lowest  $\text{Co}(\text{III})\text{-O}^{\bullet-}$  charge transfer for the cluster  $\{[\text{Co}(\text{O})(\text{NC})_4](\mu_2\text{-NC})[\text{Fe}(\text{CN})_6]\}^{5-}$  calculated by TD-DFT U-PBE0/Def2-TZVP. The array of point-charges is not shown for clarity. Positive (green) and negative (yellow) regions show that an electron is transferred from Co to O to generate a  $\text{Co}(\text{IV})\text{-O}^{2-}$  excited state. This state lies 64 kcal mol<sup>-1</sup> above the ground state in this level of theory.

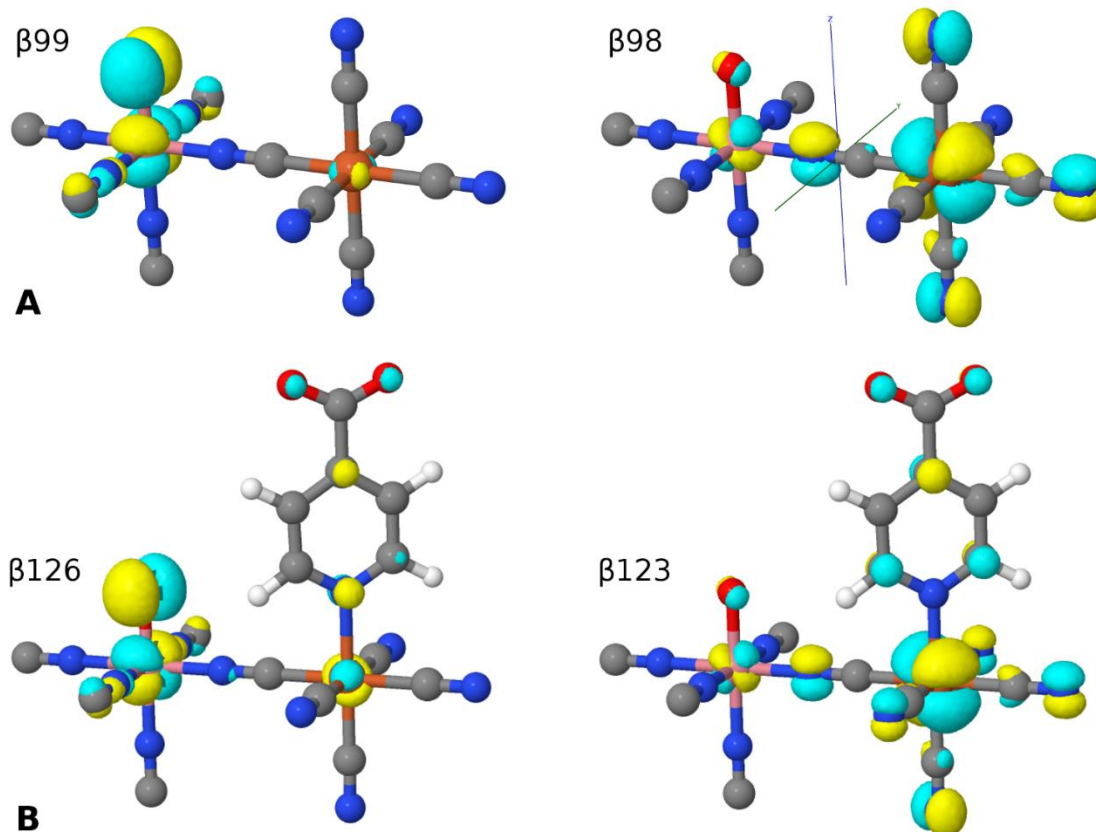

**Figure S11.** Plots of virtual  $\beta$  Kohn-Sham orbitals obtained with U-PBE0/Def2-TZVP for the clusters  $\{[\text{Co}(\text{O})(\text{NC})_4](\mu_2\text{-NC})[\text{Fe}(\text{CN})_5(\text{L})]\}^{5-}$  A)  $\text{L}=\text{CN}^-$  and B)  $\text{L}=\text{isn}$ . The array of point-charges is not shown for clarity.



**Table S3.** Kohn-Sham orbital composition (%) based on the UPBE0/Def2-TZVP calculations for  $\{[\text{Co}(\text{O})(\text{NC})_4](\mu_2\text{-NC})[\text{Fe}(\text{CN})_6]\}^{5-}$  cluster embedded in the array of point-charges. Frontier orbitals for each set are shown in bold face.

| #          | E/a.u.        | Alpha set  |             |             |             | #         | E/a.u.        | Beta set    |             |             |      |
|------------|---------------|------------|-------------|-------------|-------------|-----------|---------------|-------------|-------------|-------------|------|
|            |               | Fe         | Co          | O           | CN          |           |               | Fe          | Co          | O           | CN   |
| 87         | -0.190        | 14.6       | 0.8         | 0.3         | 84.2        | 87        | -0.186        | 11.8        | 1.3         | 0.1         | 86.9 |
| 88         | -0.189        | 0.0        | 10.8        | 6.7         | 82.5        | 88        | -0.177        | 5.3         | 7.3         | 3.0         | 84.4 |
| 89         | -0.187        | 0.9        | 12.4        | 32.7        | 54.0        | 89        | -0.176        | 5.0         | 32.7        | 0.0         | 62.3 |
| 90         | -0.186        | 14.0       | 1.2         | 2.0         | 82.8        | 90        | -0.172        | 7.4         | 10.0        | 2.0         | 80.7 |
| 91         | -0.178        | 3.5        | 11.1        | 6.4         | 79.0        | 91        | -0.171        | 6.1         | 23.1        | 0.0         | 70.8 |
| 92         | -0.177        | 11.6       | 28.2        | 0.0         | 60.1        | 92        | -0.168        | 0.0         | 57.7        | 1.1         | 41.1 |
| 93         | -0.173        | 15.9       | 21.9        | 0.0         | 62.2        | 93        | -0.166        | 6.2         | 15.2        | 17.6        | 61.0 |
| 94         | -0.168        | 17.5       | 2.1         | 0.6         | 79.8        | 94        | -0.158        | 4.5         | 13.9        | 16.0        | 65.7 |
| 95         | -0.165        | 8.6        | 11.1        | 2.5         | 77.8        | 95        | -0.133        | 73.1        | 2.3         | 0.0         | 24.6 |
| 96         | -0.160        | 0.0        | 56.9        | 23.5        | 19.7        | 96        | -0.129        | 72.9        | 0.0         | 0.0         | 27.1 |
| 97         | -0.153        | 59.1       | 8.5         | 0.0         | 32.4        | <b>97</b> | <b>-0.092</b> | <b>3.7</b>  | <b>14.0</b> | <b>58.2</b> | 24.1 |
| 98         | -0.148        | 60.4       | 0.1         | 0.0         | 39.6        | <b>98</b> | <b>0.020</b>  | <b>66.4</b> | <b>0.7</b>  | <b>0.3</b>  | 32.6 |
| <b>99</b>  | <b>-0.116</b> | <b>2.7</b> | <b>20.3</b> | <b>57.3</b> | <b>19.8</b> | 99        | 0.072         | 0.0         | 7.4         | 58.6        | 33.9 |
| <b>100</b> | <b>0.073</b>  | <b>2.3</b> | <b>56.3</b> | <b>0.0</b>  | <b>41.4</b> | 100       | 0.072         | 1.0         | 61.3        | 0.2         | 37.4 |
| 101        | 0.095         | 2.6        | 47.3        | 9.0         | 41.1        | 101       | 0.092         | 2.3         | 46.8        | 11.5        | 39.4 |
| 102        | 0.117         | 12.6       | 0.8         | 0.1         | 86.5        | 102       | 0.132         | 12.5        | 0.3         | 0.0         | 87.1 |
| 103        | 0.129         | 12.5       | 0.1         | 0.0         | 87.5        | 103       | 0.155         | 12.2        | 0.0         | 0.0         | 87.9 |
| 104        | 0.160         | 5.7        | 3.4         | 0.0         | 90.8        | 104       | 0.161         | 2.2         | 5.2         | 0.0         | 92.6 |
| 105        | 0.161         | 5.3        | 1.9         | 1.4         | 91.4        | 105       | 0.164         | 0.4         | 3.2         | 3.4         | 93.0 |
| 106        | 0.163         | 4.3        | 1.4         | 0.0         | 94.3        | 106       | 0.165         | 7.8         | 0.3         | 0.0         | 92.0 |
| 107        | 0.164         | 2.5        | 1.8         | 1.7         | 94.0        | 107       | 0.169         | 4.5         | 1.4         | 0.1         | 94.0 |
| 108        | 0.168         | 3.2        | 1.5         | 0.1         | 95.3        | 108       | 0.171         | 0.6         | 2.3         | 1.0         | 96.1 |
| 109        | 0.169         | 0.3        | 3.3         | 0.3         | 96.1        | 109       | 0.173         | 10.3        | 0.1         | 0.0         | 89.6 |
| 110        | 0.170         | 9.1        | 0.0         | 0.0         | 90.9        | 110       | 0.175         | 1.7         | 1.6         | 0.3         | 96.4 |

**Table S4.** Kohn-Sham orbital composition (%) based on the UPBE0/Def2-TZVP calculations for  $\{[\text{Co}(\text{O})(\text{NC})_4](\mu_2\text{-NC})[\text{Fe}(\text{CN})_5(\text{isn})]\}^{5-}$  cluster embedded in the array of point-charges. Frontier orbitals for each set are shown in bold face.

| Alpha set  |               |             |            |            |             |             | Beta set   |               |             |             |             |             |            |
|------------|---------------|-------------|------------|------------|-------------|-------------|------------|---------------|-------------|-------------|-------------|-------------|------------|
| #          | E/a.u.        | Fe          | Co         | O          | CN          | isn         | #          | E/a.u.        | Fe          | Co          | O           | CN          | isn        |
| 112        | -0.211        | 0.5         | 13.4       | 5.5        | 80.1        | 0.5         | 112        | -0.202        | 8.3         | 58.1        | 0.0         | 32.8        | 0.8        |
| 113        | -0.209        | 18.0        | 13.1       | 19.6       | 45.6        | 3.7         | 113        | -0.198        | 6.7         | 31.0        | 4.2         | 55.6        | 2.5        |
| 114        | -0.209        | 22.9        | 16.2       | 14.7       | 45.4        | 0.8         | 114        | -0.194        | 1.8         | 2.2         | 1.1         | 6.4         | 88.5       |
| 115        | -0.207        | 6.5         | 4.6        | 0.2        | 32.4        | 56.3        | 115        | -0.192        | 8.9         | 45.6        | 1.7         | 40.5        | 3.3        |
| 116        | -0.204        | 22.0        | 1.3        | 4.1        | 49.9        | 22.7        | 116        | -0.188        | 23.6        | 20.3        | 20.9        | 30.2        | 5.0        |
| 117        | -0.198        | 6.0         | 31.2       | 7.4        | 45.4        | 10.0        | 117        | -0.183        | 29.7        | 13.5        | 20.7        | 30.1        | 6.0        |
| 118        | -0.195        | 18.0        | 46.5       | 0.0        | 34.2        | 1.3         | 118        | -0.182        | 59.6        | 7.6         | 0.2         | 30.3        | 2.3        |
| 119        | -0.194        | 2.2         | 2.3        | 1.1        | 8.6         | 85.8        | 119        | -0.141        | 0.4         | 0.0         | 0.0         | 0.9         | 98.7       |
| 120        | -0.184        | 0.3         | 56.0       | 21.2       | 21.6        | 0.9         | 120        | -0.136        | 2.1         | 0.0         | 0.0         | 5.4         | 92.5       |
| 121        | -0.141        | 0.8         | 16.5       | 48.6       | 10.6        | 23.5        | 121        | -0.125        | 0.1         | 0.0         | 0.0         | 0.3         | 99.6       |
| 122        | -0.141        | 0.3         | 0.1        | 0.4        | 1.0         | 98.2        | <b>122</b> | <b>-0.118</b> | <b>1.2</b>  | <b>15.5</b> | <b>66.6</b> | <b>15.6</b> | <b>1.1</b> |
| 123        | -0.136        | 2.1         | 0.0        | 0.0        | 5.7         | 92.2        | <b>123</b> | <b>-0.028</b> | <b>64.2</b> | <b>0.2</b>  | <b>0.3</b>  | <b>26.0</b> | <b>9.3</b> |
| <b>124</b> | <b>-0.125</b> | <b>0.1</b>  | <b>0.0</b> | <b>0.0</b> | <b>0.2</b>  | <b>99.7</b> | 124        | 0.045         | 3.7         | 4.7         | 1.3         | 16.3        | 74.0       |
| <b>125</b> | <b>0.037</b>  | <b>23.2</b> | <b>3.6</b> | <b>0.0</b> | <b>41.7</b> | <b>31.5</b> | 125        | 0.046         | 5.4         | 44.2        | 0.2         | 32.8        | 17.4       |
| 126        | 0.040         | 2.2         | 0.5        | 0.1        | 8.8         | 88.4        | 126        | 0.048         | 5.2         | 5.5         | 41.2        | 33.8        | 14.3       |
| 127        | 0.049         | 9.6         | 23.3       | 0.0        | 62.5        | 4.6         | 127        | 0.059         | 23.1        | 4.3         | 0.7         | 40.7        | 31.2       |
| 128        | 0.063         | 10.9        | 1.9        | 0.3        | 76.3        | 10.6        | 128        | 0.067         | 3.4         | 39.8        | 10.4        | 37.0        | 9.4        |
| 129        | 0.071         | 0.5         | 41.5       | 8.3        | 27.4        | 22.3        | 129        | 0.069         | 3.9         | 3.0         | 0.7         | 26.1        | 66.3       |
| 130        | 0.082         | 11.9        | 0.7        | 0.1        | 84.2        | 3.1         | 130        | 0.100         | 12.2        | 0.1         | 0.0         | 87.1        | 0.6        |
| 131        | 0.115         | 4.5         | 0.1        | 0.0        | 42.9        | 52.5        | 131        | 0.118         | 5.6         | 0.1         | 0.0         | 40.6        | 53.7       |
| 132        | 0.121         | 12.6        | 0.1        | 0.0        | 80.7        | 6.6         | 132        | 0.127         | 12.0        | 0.1         | 0.0         | 76.9        | 11.0       |
| 133        | 0.126         | 9.2         | 0.0        | 0.0        | 71.9        | 18.9        | 133        | 0.133         | 12.1        | 0.3         | 0.1         | 77.7        | 9.8        |
| 134        | 0.133         | 11.8        | 0.3        | 0.2        | 77.1        | 10.6        | 134        | 0.140         | 6.5         | 1.0         | 0.0         | 85.4        | 7.1        |
